# Supplementary material for: Mortality and demographic recovery in early post-black death epidemics: Role of recent emigrants in medieval Dijon
Source: PLOS journal article supplement (doi:10.1371/journal.pone.0226420), 2020-01-22
Supplement: S20 (10.1371/journal.pone.0226420.s020) [file journal.pone.0226420.s020]

**S3 Table. Actual numbers in Fig 3**

| Time since registration | Number of dead | Total number of households* |
|-------------------------|----------------|-----------------------------|
| 1-3 years               | 80             | 336                         |
| 4-6 years               | 38             | 230                         |
| 7-14 years              | 97             | 601                         |
| 15-24 years             | 52             | 376                         |
| ≥ 25 years              | 57             | 453                         |

\* The numbers may slightly differ from those in **S2 Table** due to lost to follow-up in 1400 and to transient absences in 1399 (**S7 Text**).
